# Supplementary material for: Influence of the processing conditions and chemical environment on the crystal structures and phonon modes of lanthanide orthotantalates
Source: Royal Society of Chemistry journal article supplement (doi:10.1039/c1dt10783f), 2011-01-01

**Supporting Information:** XRD patterns for all lanthanide orthotantalate materials studied in the present work.

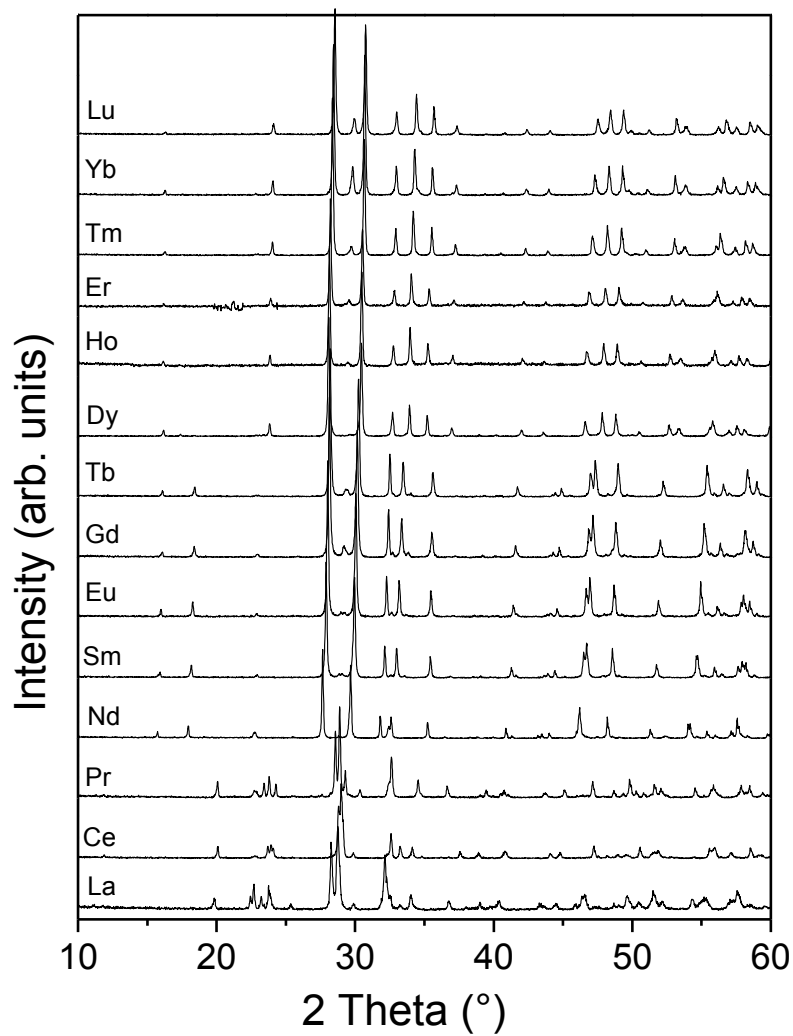

Supplement: c1dt10783f.pdf [file c1dt10783f.pdf]
